# Supplementary material
Source: publisher figshare collection journal article supplement (https://sage.figshare.com/ndownloader/files/38942755)
Supplement: Supplementary file 1 [file 38942755]

**Supplemental Table 1 Ways to learn about the disease among clinicians who understand** **eosinophilia.**

| Ways to learn about the disease | fair understanding | good understanding | extremely good understanding | Total |
| --- | --- | --- | --- | --- |
| Journals | 198(49.9%) | 67(16.9%) | 20(5.0%) | 285(71.80%) |
| Meetings | 86(21.7%) | 27(6.80%) | 19(4.8%) | 132(33.2%) |
| Internet | 156(39.3%) | 47(11.8%) | 18(4.5%) | 221(55.7%) |
| Colleagues | 106(26.7%) | 33(8.3%) | 11(2.8%) | 150(37.8%) |
| Patients’ consultation | 43(10.8%) | 18(4.5%) | 10(2.5%) | 71(17.9%) |
| other | 27(6.8%) | 9(2.3%) | 0(0.00%) | 36(9.1%) |
| Total | 293(73.8%) | 78(19.6%) | 26(6.5%) | 397(100.00%) |
